# Supplementary material for: Haystack, a web-based tool for metabolomics research
Source: PubMed Central journal article supplement (PMC4251040; doi:10.1186/1471-2105-15-s11-s12), 2014-10-21

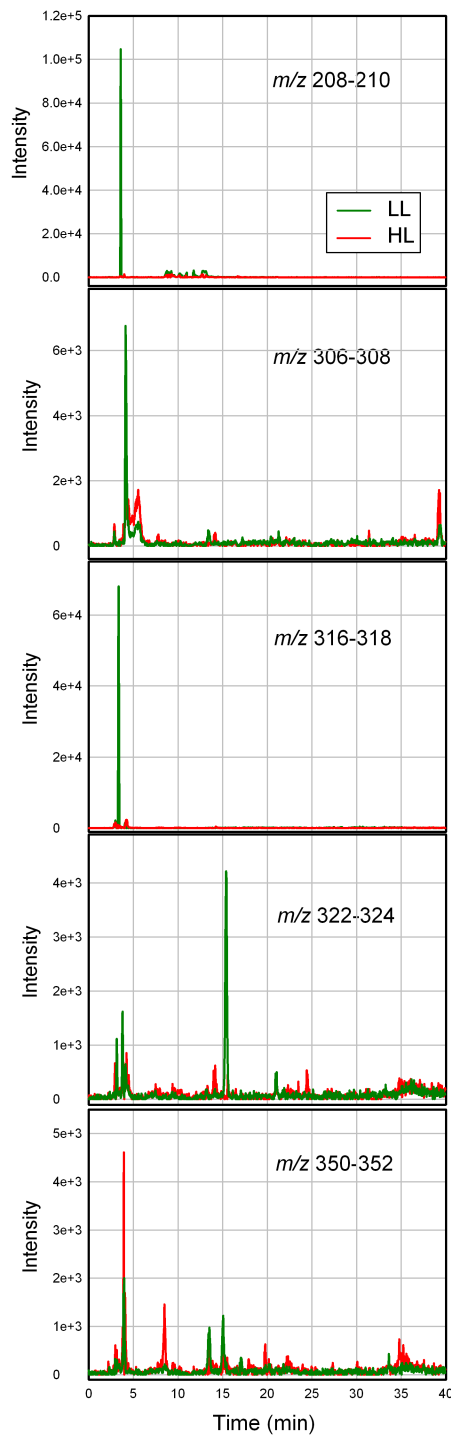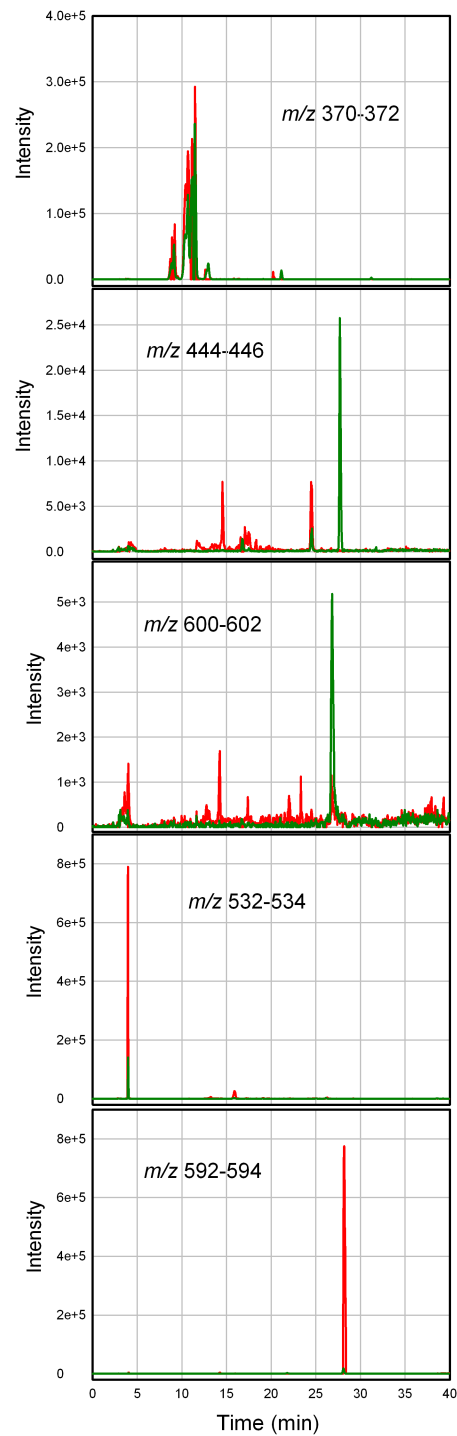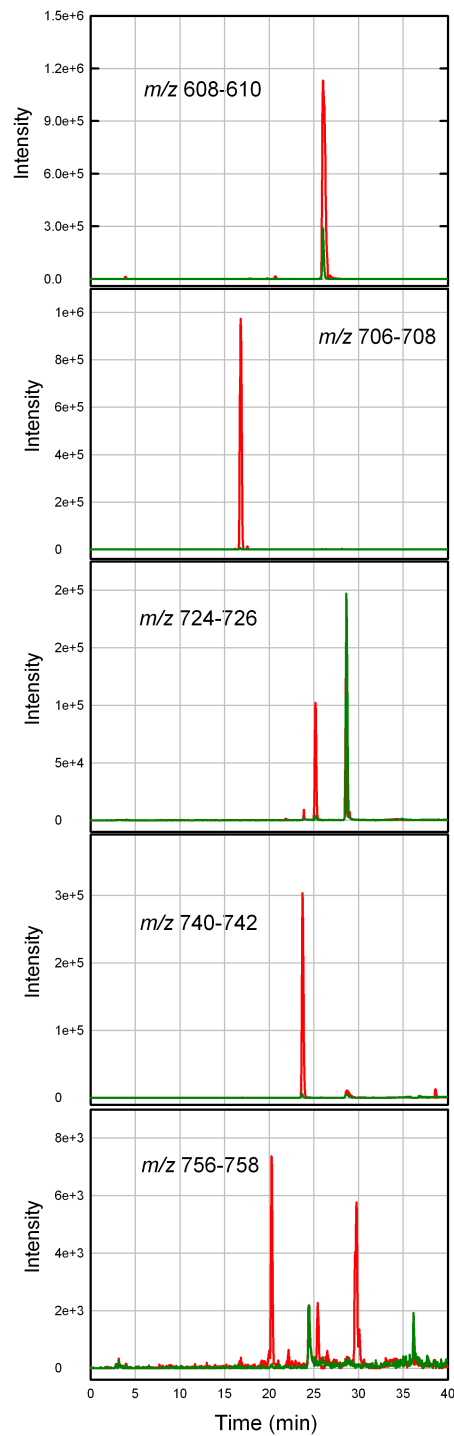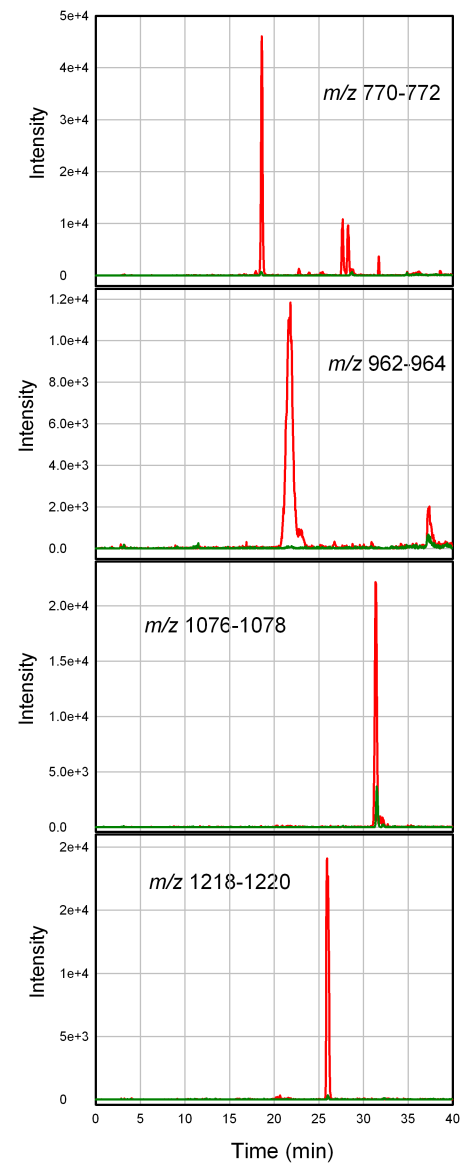

Supplement: 1471-2105-15-S11-S12-S2.pdf [file 1471-2105-15-S11-S12-S2.pdf]
